# Supplementary material for: Synthesis and optical properties of a Y3(Al/Ga)5O12:Ce3+,Cr3+,Nd3+ persistent luminescence nanophosphor: a promising near-infrared-II nanoprobe for biological applications
Source: Royal Society of Chemistry journal article supplement (doi:10.1039/d0nr03269g), 2020-01-01
Supplement: d0nr03269g1.pdf [file d0nr03269g1.pdf]

## Supporting Information

### **Synthesis and optical properties of $\text{Y}_3(\text{Al/Ga})_5\text{O}_{12}$ : $\text{Ce}^{3+}$ , $\text{Cr}^{3+}$ , $\text{Nd}^{3+}$ persistent luminescence nanophosphor: a promising near-infrared-II nanoprobe for biological applications**

Luyan Wu,<sup>abc</sup> Jie Hu,<sup>ab</sup> Qilin Zou,<sup>d</sup> Yaling Lin,<sup>ab</sup> Decai Huang,<sup>ab</sup> Dejian Chen,<sup>ab</sup> Hongyu Lu,<sup>ab</sup> Haomiao Zhu<sup>abc\*</sup>

[a]CAS Key Laboratory of Design and Assembly of Functional Nanostructures, and Fujian Key Laboratory of Nanomaterials, Fujian Institute of Research on the Structure of Matter, Chinese Academy of Sciences, Fuzhou, Fujian 350002, China, E-mail: zhm@fjirsm.ac.cn

[b]Xiamen Institute of Rare Earth Materials, Haixi Institute, Chinese Academy of Sciences, Xiamen, Fujian 361021, China

[c] University of the Chinese Academy of Sciences, Beijing 100049, China

[d] Centre d'Elaboration de Matériaux et d'Etudes Structurales (CEMES), CNRS, Université de Toulouse - UPS, 29 rue Jeanne Marvig, BP 94347, 31055 Toulouse, Cedex 4, France

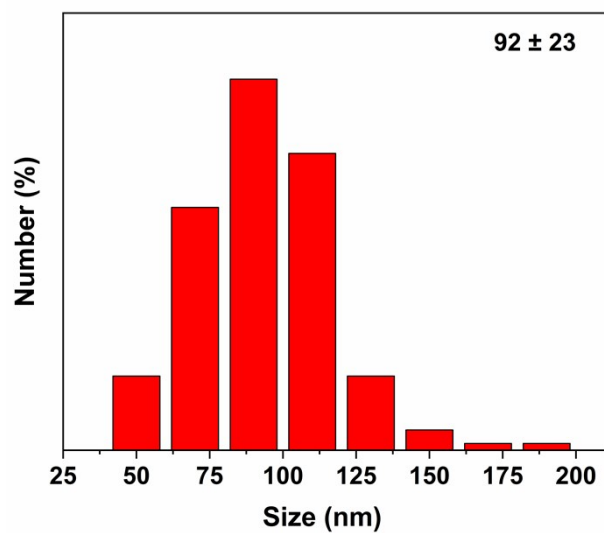

**Fig. S1** Size distribution of the synthesized YAGG: Ce<sup>3+</sup>, Cr<sup>3+</sup>, Nd<sup>3+</sup> (Ga content of x = 3.75) nanocrystals, which was obtained by calculating 100 particles in the TEM images.

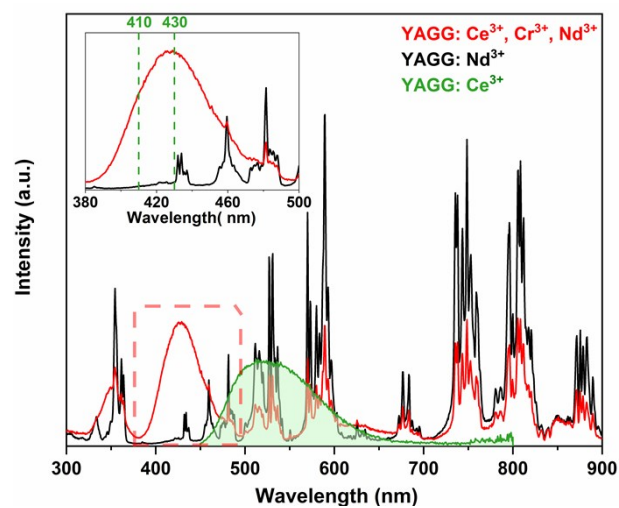

**Fig. S2** Photoluminescence (PL) spectrum of the YAGG: Ce<sup>3+</sup> ( $x = 3.75$ ) nanocrystals under excitation at 430 nm. PL excitation spectra of YAGG: Ce<sup>3+</sup>, Cr<sup>3+</sup>, Nd<sup>3+</sup> ( $x = 3.75$ ) and YAGG: Nd<sup>3+</sup> ( $x = 3.75$ ) nanocrystals by monitoring the emission of Nd<sup>3+</sup> ions at 1063 nm. The inset shows the enlarged PL excitation spectra in the range of 380 - 500 nm.

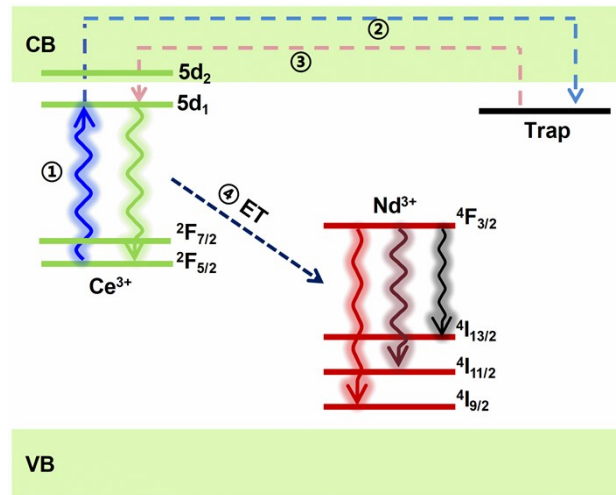

**Fig. S3** Schematic illustration of the proposed persistent luminescence mechanism in YAGG: Ce<sup>3+</sup>, Cr<sup>3+</sup>, Nd<sup>3+</sup> nanocrystals. VB and CB denote the valence and conduction bands of YAGG: Ce<sup>3+</sup>, Cr<sup>3+</sup>, Nd<sup>3+</sup>, respectively.

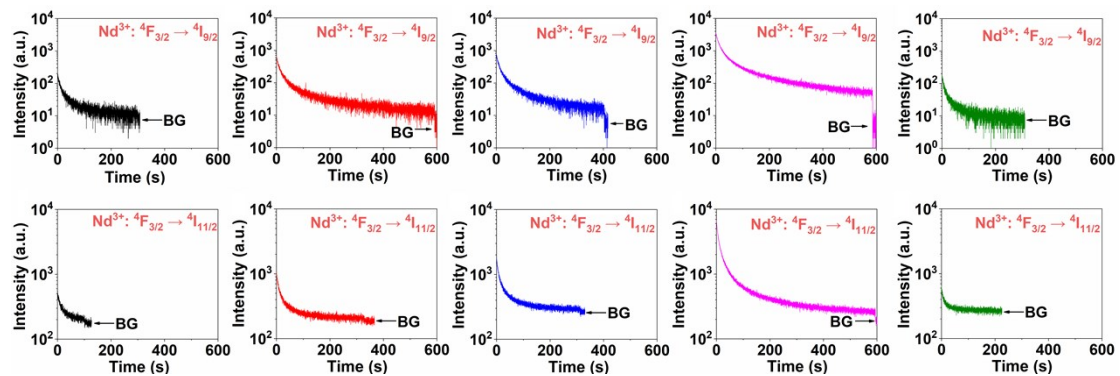

**Fig. S4** Persistent luminescence decay curves recorded by monitoring the emissions at 890 nm (the up panels) and 1063 nm (the bottom panels) of  $\text{Nd}^{3+}$  ions in YAGG:  $\text{Ce}^{3+}$ ,  $\text{Cr}^{3+}$ ,  $\text{Nd}^{3+}$  samples (from left to right:  $x = 3.00$ ,  $3.25$ ,  $3.50$ ,  $3.75$  and  $4.00$ ). The samples were illuminated by a 410-nm diode (3 W) for 10 min before measurements.

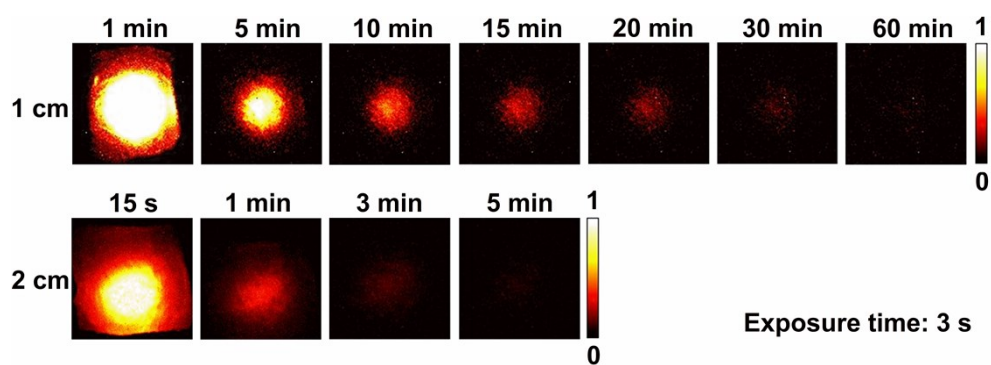

**Fig. S5** NIR persistent luminescence images of the YAGG: Ce<sup>3+</sup>, Cr<sup>3+</sup>, Nd<sup>3+</sup> ( $x = 3.75$ ) PLNPs covered with 1 and 2 cm chicken breast taken at different delayed time after being illuminated for 5 min with a 410-nm diode.

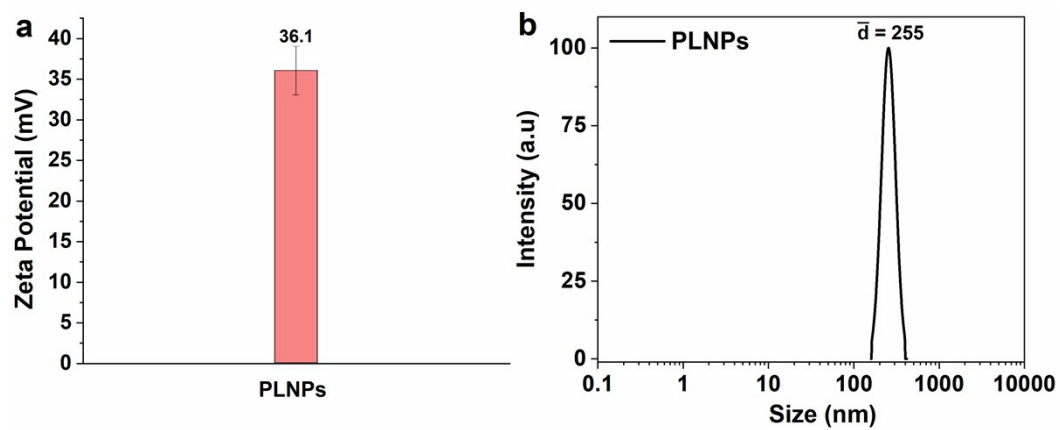

**Fig. S6** (a) The zeta potential and (b) hydrodynamic diameter of YAGG:  $\text{Ce}^{3+}$ ,  $\text{Cr}^{3+}$ ,  $\text{Nd}^{3+}$  nanocrystals in ultrapure water (pH = 5.6) measured by dynamic light scattering (DLS) technique.
